# Supplementary material for: Gut microbiota, serum metabolites, and lipids related to blood glucose control and type 1 diabetes
Source: PubMed Central journal article supplement (PMC11513438; doi:10.1111/1753-0407.70021), 2024-10-27
Supplement: JDB-16-e70021-s001.pdf [file JDB-16-e70021-s001.pdf]

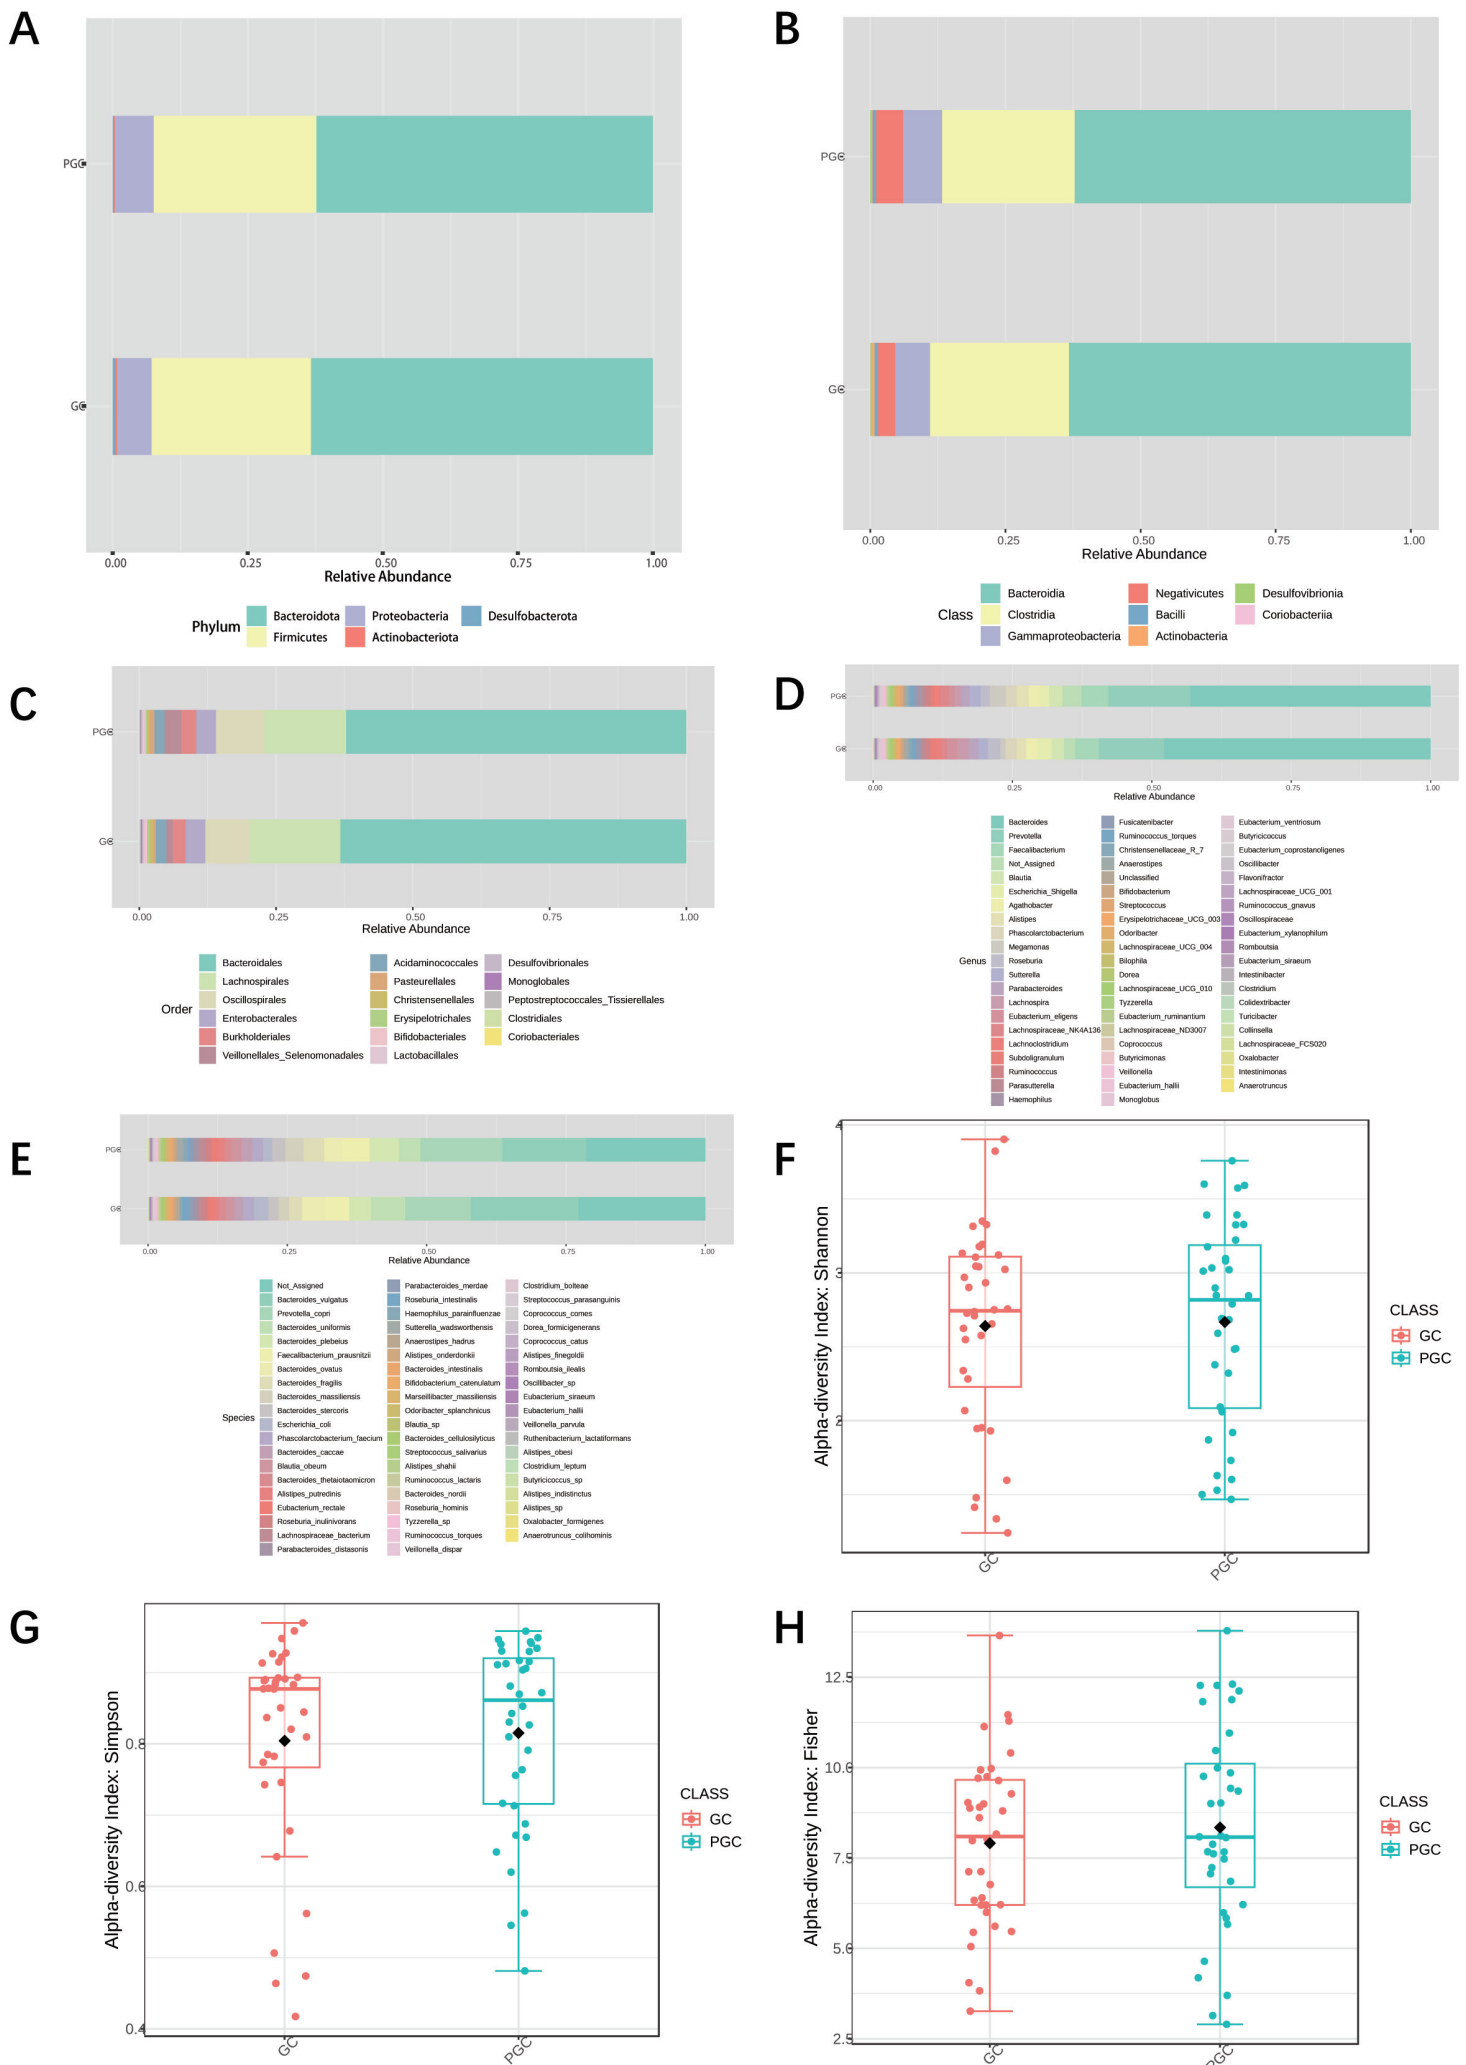

Figure. S1. Supplemental results of diversity and taxonomy. The stacked bar plots at phylum (A), class (B), order (C), genus (D), species (E) level. (F-H) The boxplots of  $\alpha$ -diversity of Shannon(F), Simpson(G) and Fisher(H) index.

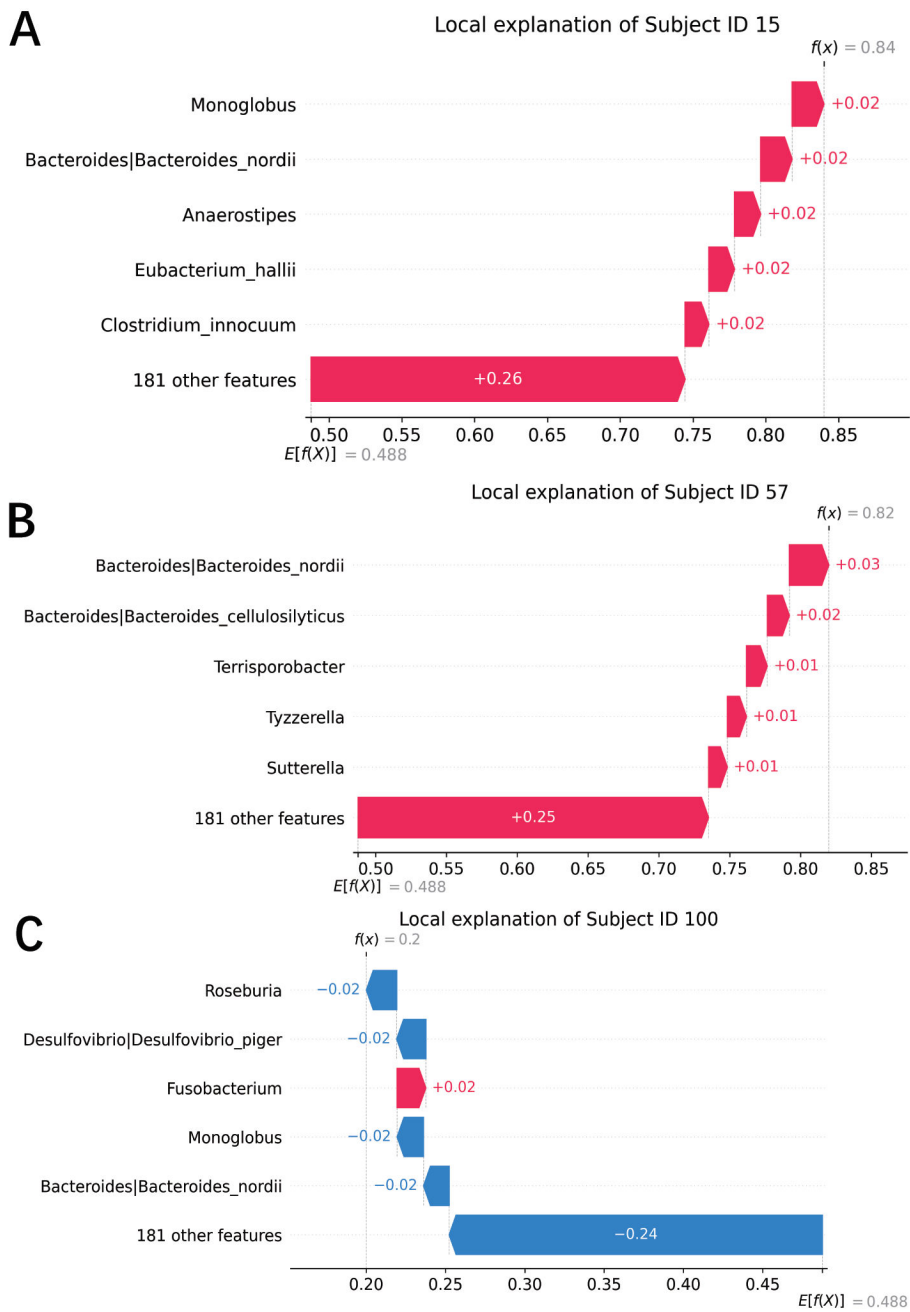

Figure. S2. The local explanations of three randomly chosen subjects of ID 15(A), ID 57(B) and ID 100(C) in GC and PGC groups.

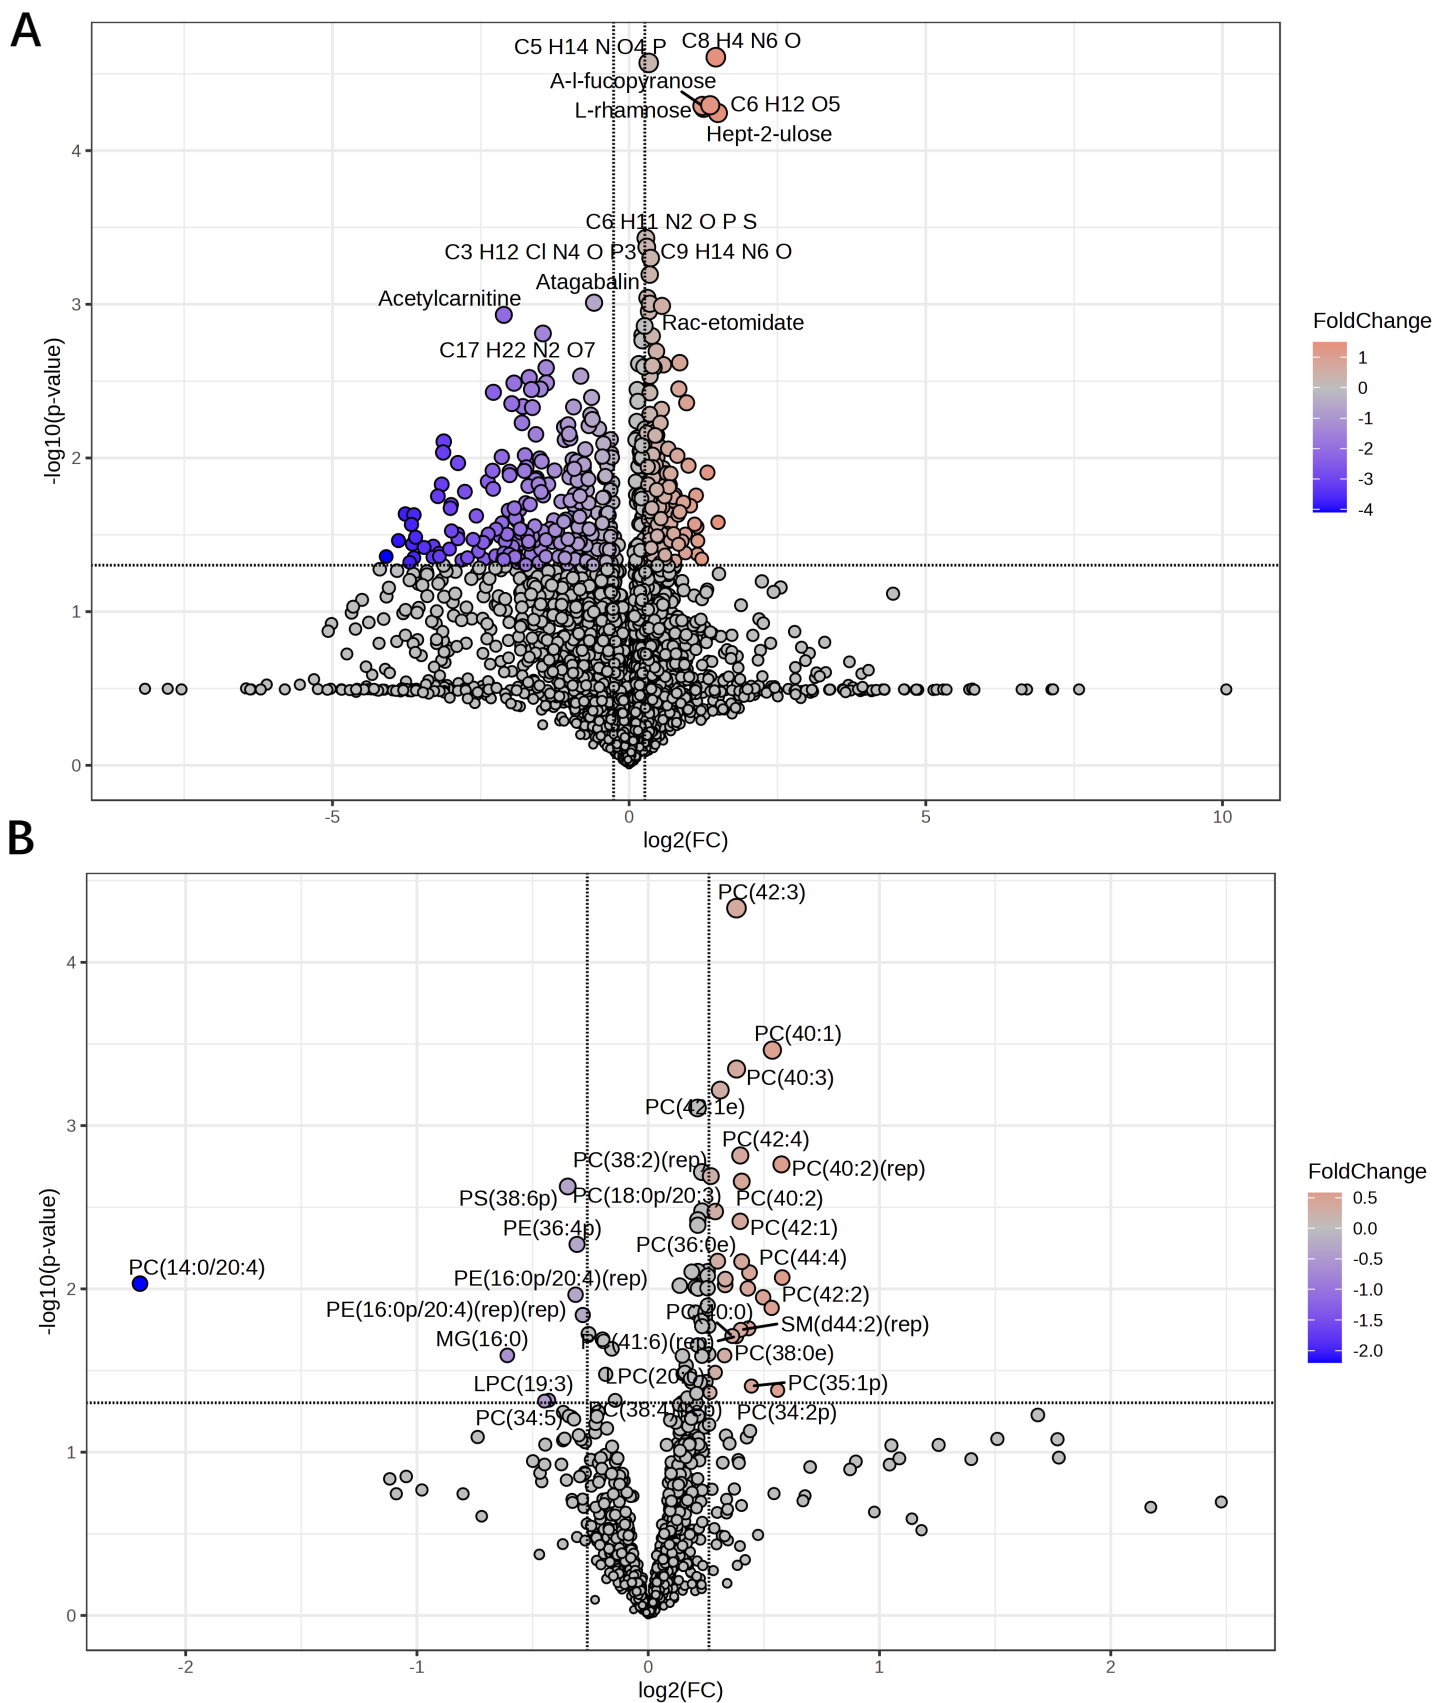

**A**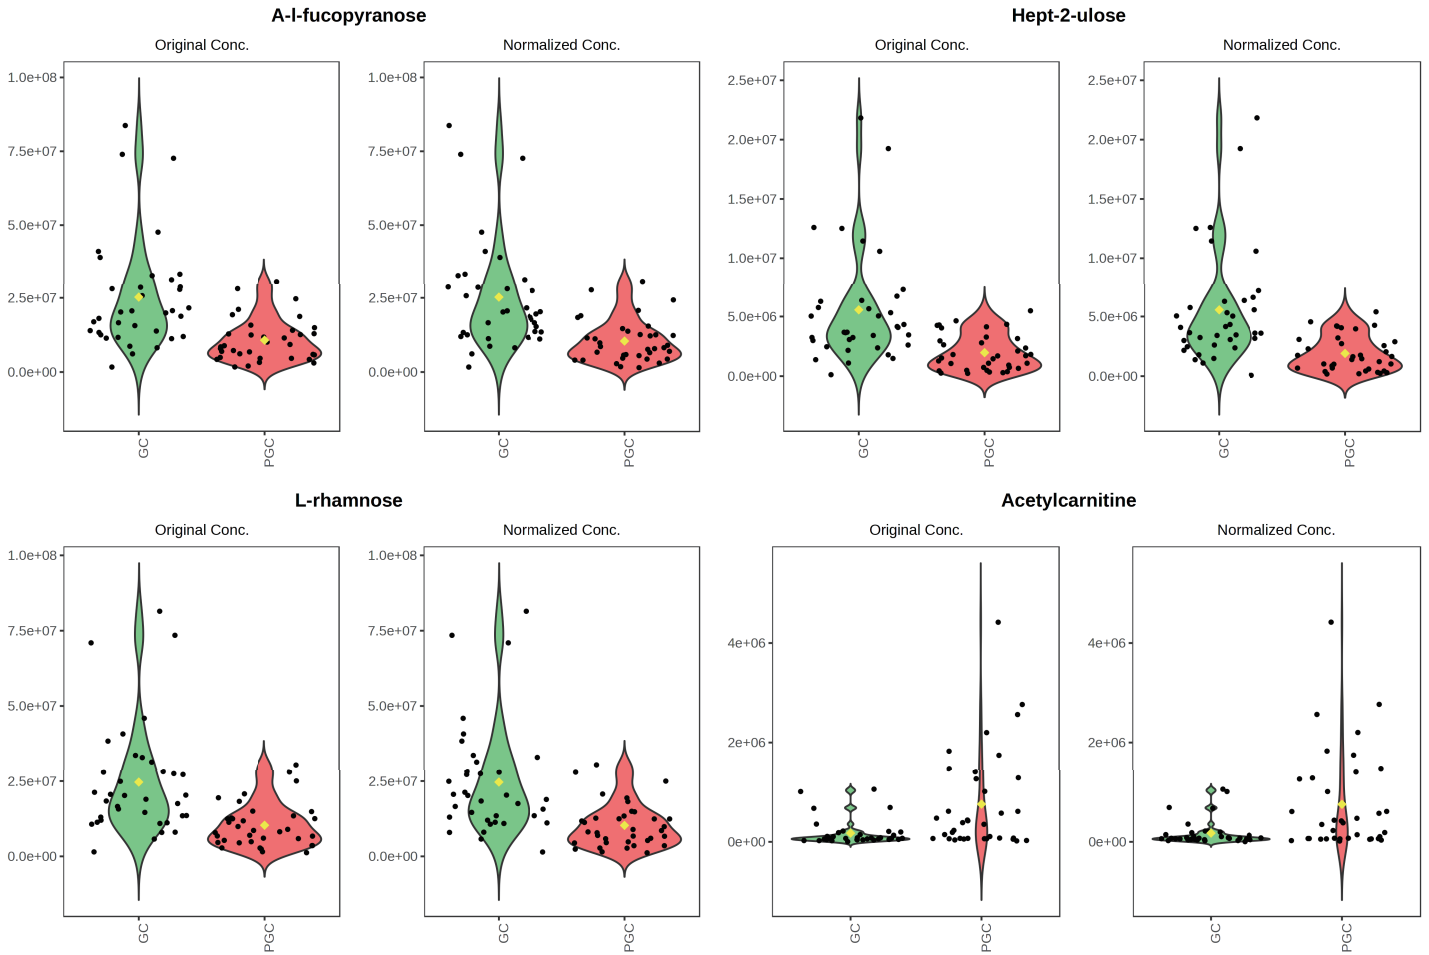**B**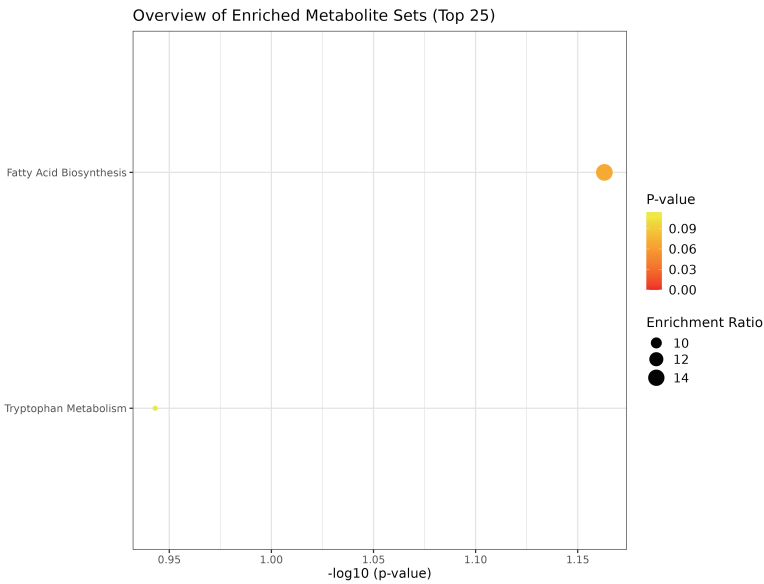**C**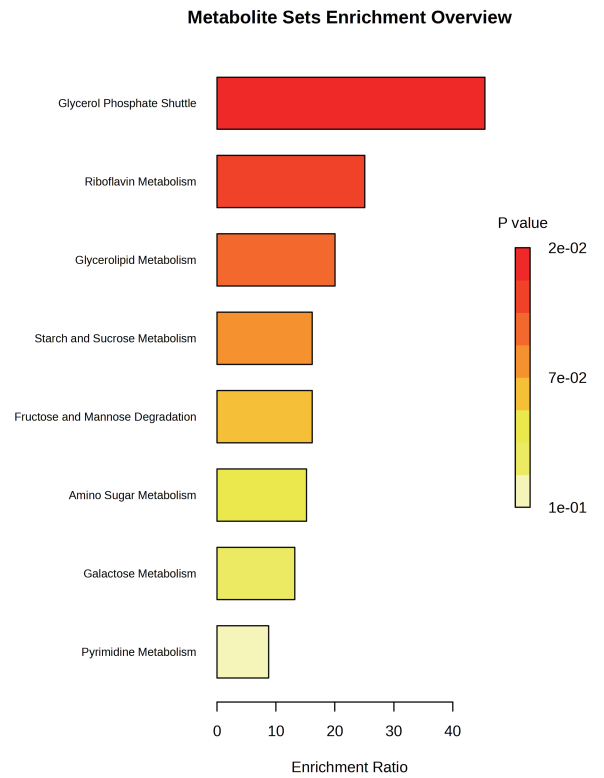

Figure.S4.The violin plots illustrating the differences between two groups for A-l-fucopyranose, Hept-2-ulose, L-rhamnose, and Acetylcarnitine. the violin plots (A).Enrichment sets of upregulated metabolites(B) and enrichment sets of downregulated metabolites(C).
